# Supplementary material for: A luminescent benzothiadiazole-bridging bis(salicylaldiminato)zinc(ii) complex with mechanochromic and organogelation properties
Source: Royal Society of Chemistry journal article supplement (doi:10.1039/c8dt00665b), 2018-01-01
Supplement: c8dt00665b1.pdf [file c8dt00665b1.pdf]

## Supporting Information

### **A luminescent benzothiadiazole-bridging bis(salicylaldiminato)zinc(II) complex with mechanochromism and organogelation properties**

Xiaoxian Song, Hanbo Yu, Xianju Yan, Yuewei Zhang, Yang Miao, Kaiqi Ye\* and Yue

Wang\*

State Key Laboratory of Supramolecular Structure and Materials, College of Chemistry,

Jilin University, Changchun 130012, P. R. China.

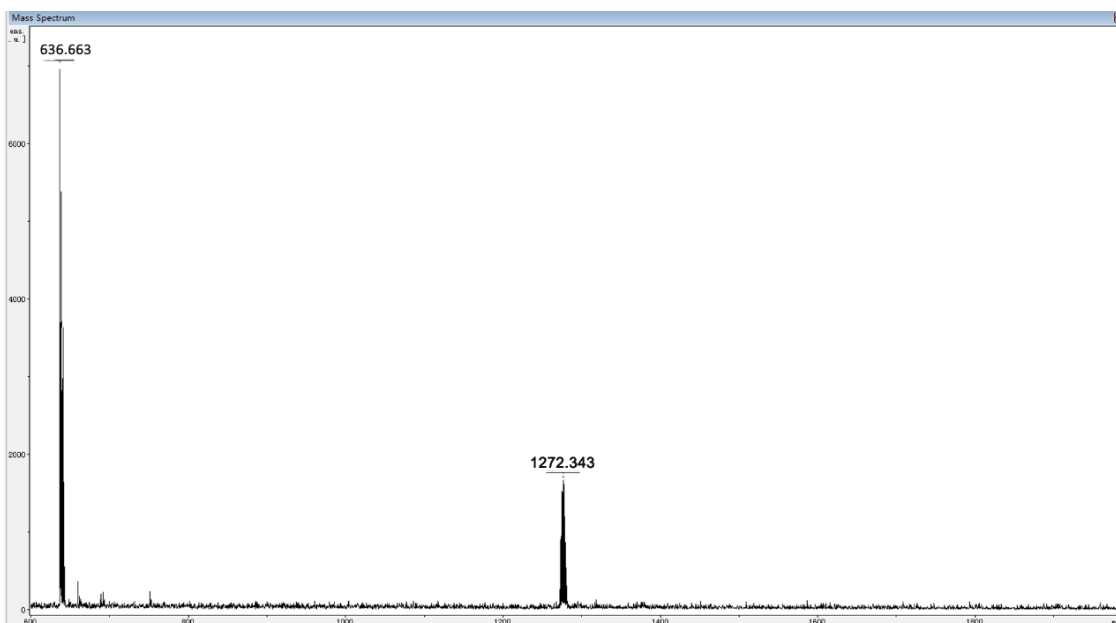

**Figure S1.** MALDI-TOF spectrum of BTZn.

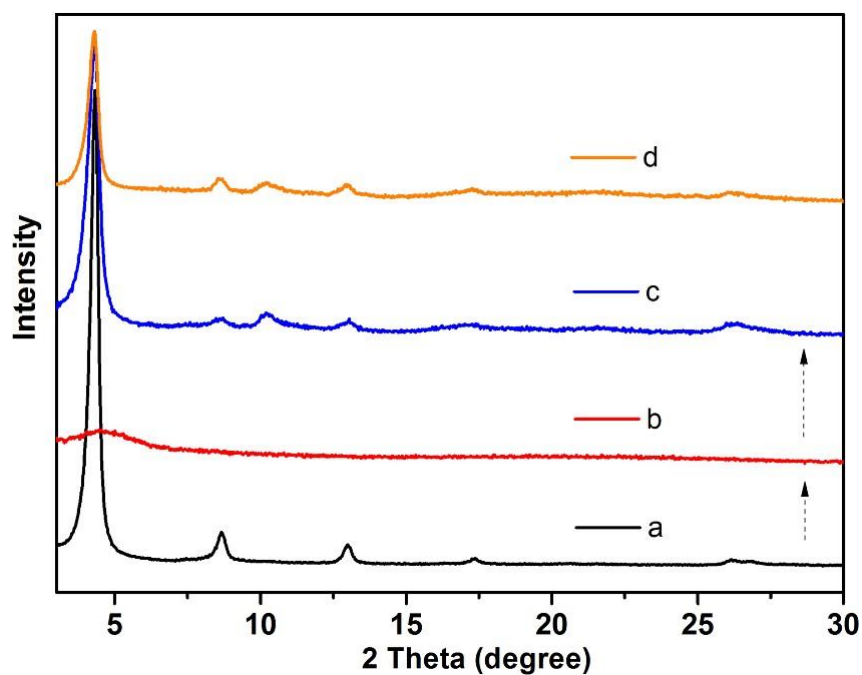

**Figure S2.** XRD patterns of various BTZn samples: (a) orange emissive solid obtained by heating the as-prepared solids at 165 °C, (b) ground solid obtained by grinding the orange emissive solid, (c) solid obtained by heating the ground sample at 125°C (d) solid prepared by heating the amorphous powder that was obtained by grinding as-prepared sample.

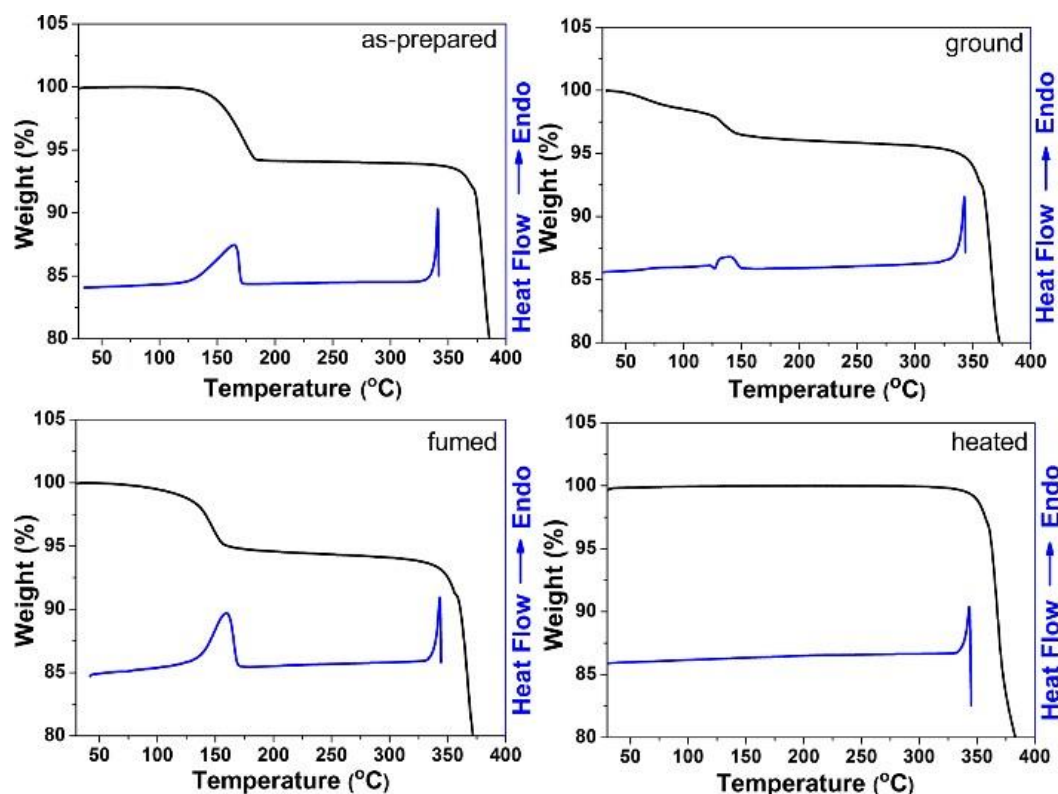

**Figure S3.** TGA (black line) and DSC (blue line) thermograms of the BTZn solids with different phases (scan rate of  $10\text{ }^{\circ}\text{C min}^{-1}$ ).

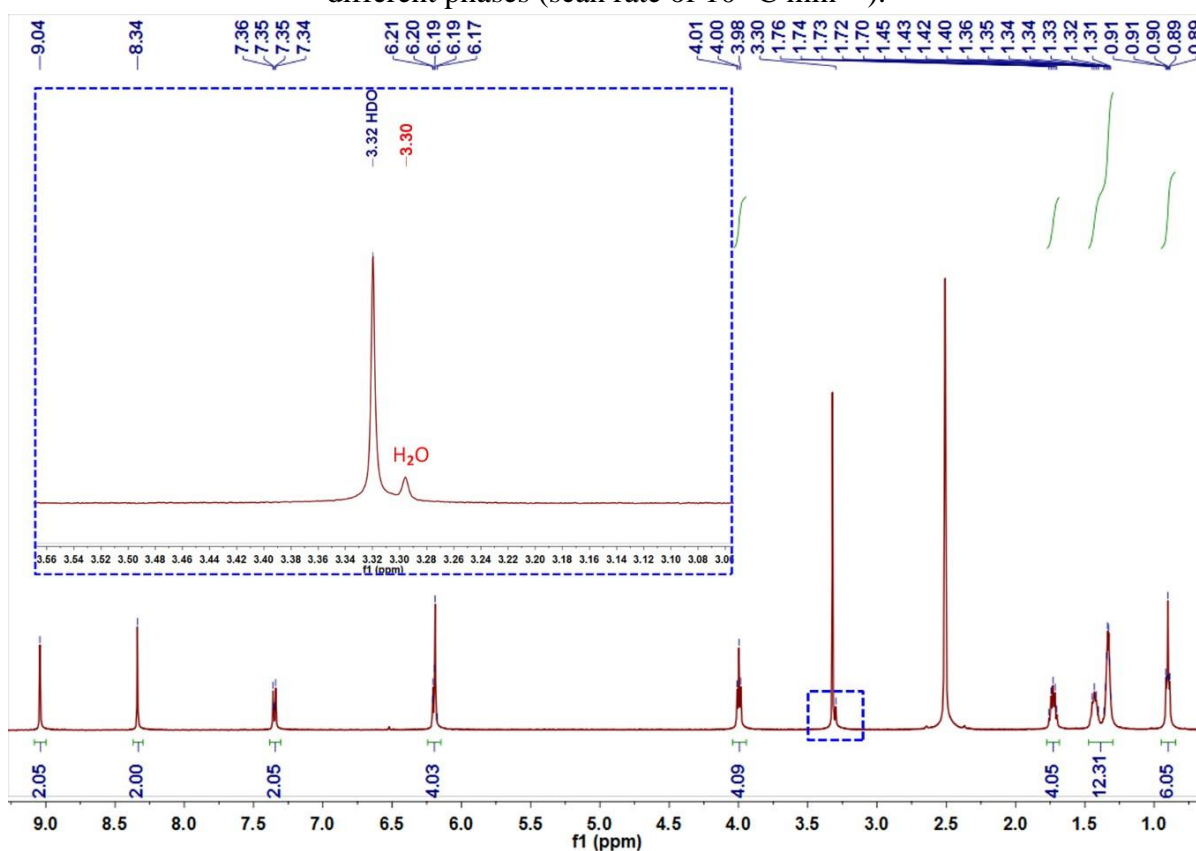

**Figure S4.**  $^1\text{H}$  NMR spectrum of the as-prepared solid of BTZn (500 MHz,  $\text{DMSO-}d_6$ ).

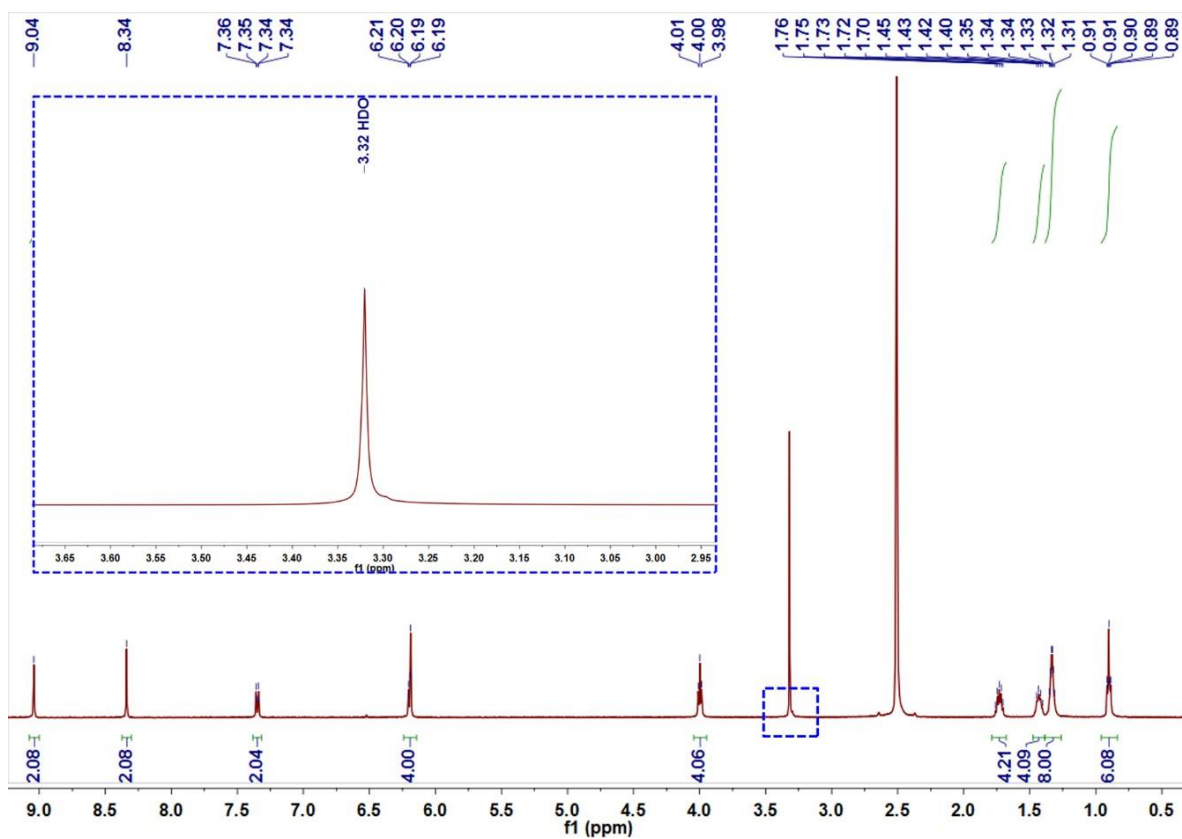

**Figure S5.**  $^1\text{H}$  NMR spectrum of the heated solid of BTZn (500 MHz,  $\text{DMSO-}d_6$ ).

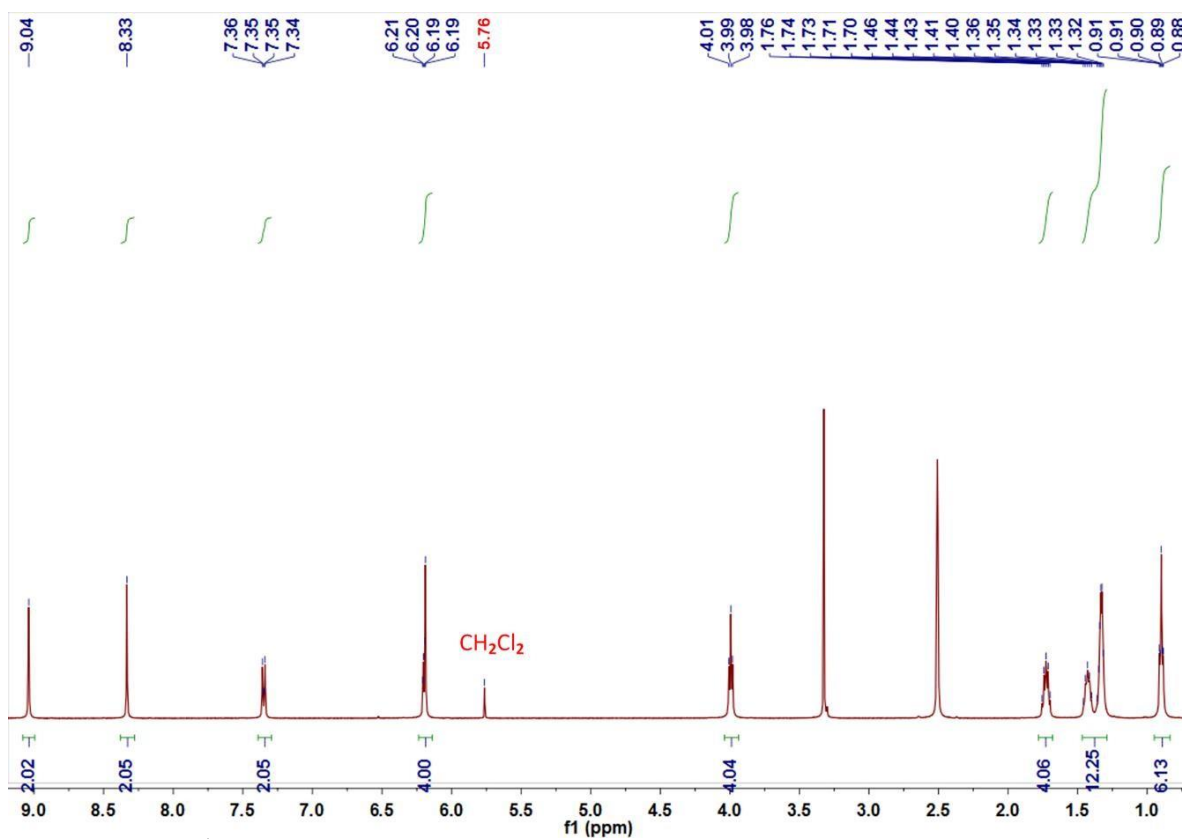

**Figure S6.**  $^1\text{H}$  NMR spectrum of the  $\text{CH}_2\text{Cl}_2$  vapor fumed solid of BTZn (500 MHz,  $\text{DMSO-}d_6$ ).

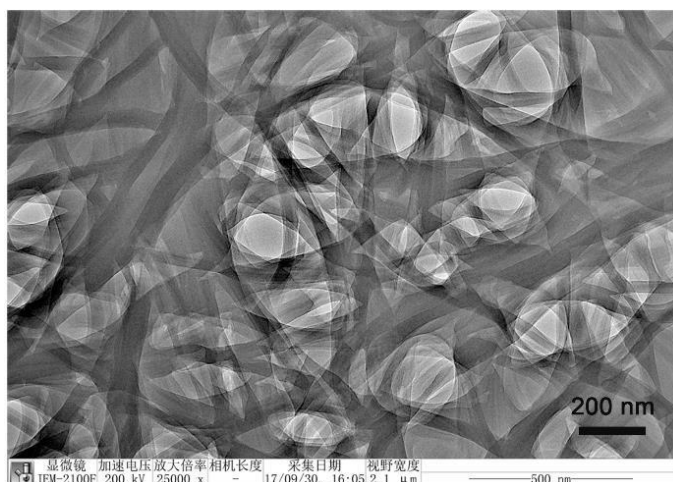

**Figure S7.** TEM image of BTZn xerogel obtained from *o*-dichlorobenzene.

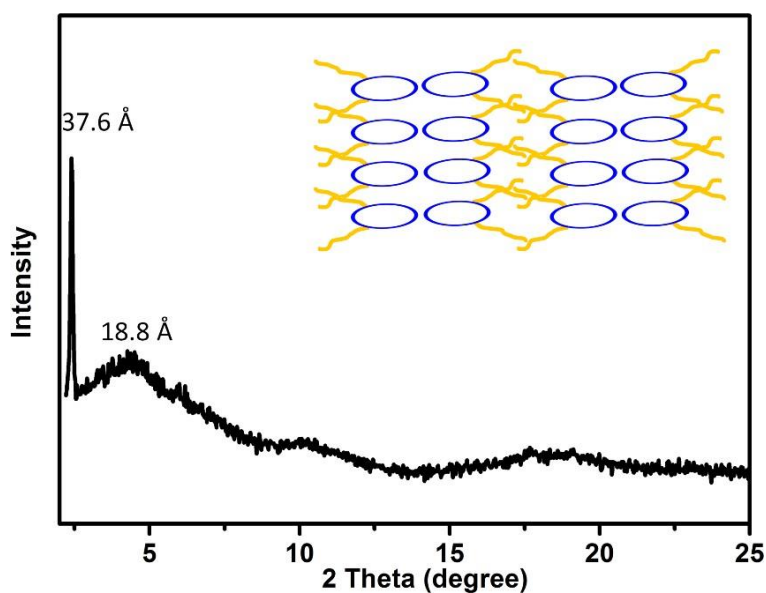

**Figure S8.** XRD pattern of BTZn xerogel obtained from toluene. Insets: representation of the lamello-columnar molecular arrangements of BTZn in gel state.

**Table S1** Gel-forming abilities of BTZn in various organic solvents.<sup>[a]</sup>

| Solvent | Hex | Tol | <i>p</i> -xylene | <i>o</i> -DCB | DCM | DCE | THF | MeCN | DMF |
|---------|-----|-----|------------------|---------------|-----|-----|-----|------|-----|
| BTZn    | I   | G   | G                | G             | P   | G   | S   | I    | S   |

[a] Concentration 1 mg/mL. I: insoluble; S: soluble; G: gel; P: precipitate.
